# Supplementary material
Source: HighWire-hosted journal article supplement (https://bmjopen.bmj.com/content/10/11/e038990)
Supplement: inline-supplementary-material-1 [file inline-supplementary-material-1.pdf]

**Additional File 1.** Comparison of creatinine POD 1 and hourly urine output (mL/kg/h) for 6, 12 and 24hours after the operation between non-AKI and AKI groups.

| Group                               | non-AKI         | AKI              | <i>p</i> |
|-------------------------------------|-----------------|------------------|----------|
| <i>n</i>                            | 364             | 115              |          |
| <i>Creatinine</i>                   |                 |                  |          |
| Creatinine POD 1 (md/dL)            | 0.81 (0.6–1.05) | 1.26 (0.96–1.79) | < 0.001  |
| <i>Urine Output Criteria</i>        |                 |                  |          |
| Urine Output for 6 hours (mL/kg/h)  | 3.6 (3.1–4.1)   | 2.5 (2.2–3.0)    | < 0.001  |
| Urine Output for 12 hours (mL/kg/h) | 1.7 (1.4–2.1)   | 0.8 (0.6–1.0)    | < 0.001  |
| Urine Output for 24 hours (mL/kg/h) | 2.2 (2.0–2.5)   | 1.4 (1.3–1.7)    | < 0.001  |

**Abbreviations:** AKI, acute kidney injury; POD, postoperative day
