# Supplementary material
Source: HighWire-hosted journal article supplement (https://bmjopen.bmj.com/content/10/11/e038990)
Supplement: inline-supplementary-material-2 [file inline-supplementary-material-2.pdf]

**Additional File 2.** Association of pre- and intraoperative recipient and donor factors with postoperative development of AKI

|                                              | Univariable analysis |            |             |          | Multivariable analysis |            |             |          |
|----------------------------------------------|----------------------|------------|-------------|----------|------------------------|------------|-------------|----------|
|                                              | $\beta$              | Odds ratio | 95% CI      | <i>p</i> | $\beta$                | Odds ratio | 95% CI      | <i>p</i> |
| <i>Preoperative recipient factors</i>        |                      |            |             |          |                        |            |             |          |
| Age (years)                                  | -0.009               | 0.991      | 0.969–1.014 | 0.457    |                        |            |             |          |
| Sex (male vs. female)                        | -0.250               | 0.779      | 0.488–1.243 | 0.295    |                        |            |             |          |
| Body mass index (kg/m <sup>2</sup> )         | 0.077                | 1.080      | 1.023–1.140 | 0.005    |                        |            |             |          |
| Nephrotoxic drug exposure                    | 0.314                | 1.369      | 0.690–2.715 | 0.368    |                        |            |             |          |
| Calcineurin inhibitor level                  | 0.083                | 1.087      | 0.959–1.232 | 0.192    |                        |            |             |          |
| <i>Comorbidity</i>                           |                      |            |             |          |                        |            |             |          |
| Diabetes mellitus                            | 0.506                | 1.659      | 1.052–2.616 | 0.029    | 0.514                  | 1.672      | 1.041–2.687 | 0.034    |
| Hypertension                                 | 0.240                | 1.272      | 0.763–2.118 | 0.356    |                        |            |             |          |
| MELD score (point)                           | 0.041                | 1.041      | 1.022–1.062 | < 0.001  |                        |            |             |          |
| <i>Hepatic decompensation</i>                |                      |            |             |          |                        |            |             |          |
| Encephalopathy (West-Haven criteria I or II) | 0.230                | 1.259      | 0.565–2.804 | 0.573    |                        |            |             |          |
| Varix                                        | 0.301                | 1.352      | 0.850–2.149 | 0.202    |                        |            |             |          |
| Ascites                                      | 0.499                | 1.647      | 1.077–2.516 | 0.021    |                        |            |             |          |
| <i>Cardiac function</i>                      |                      |            |             |          |                        |            |             |          |
| Ejection fraction (%)                        | 0.020                | 1.020      | 0.974–1.069 | 0.392    |                        |            |             |          |
| Diastolic dysfunction                        | -0.036               | 0.965      | 0.634–1.469 | 0.867    |                        |            |             |          |
| <i>Laboratory variables</i>                  |                      |            |             |          |                        |            |             |          |
| Hemoglobin (g/L)                             | -0.086               | 0.918      | 0.831–1.013 | 0.090    |                        |            |             |          |
| WBC count (x 10 <sup>9</sup> /L)             | 0.034                | 1.034      | 0.995–1.076 | 0.092    |                        |            |             |          |
| Albumin (g/dL)                               | 0.037                | 1.038      | 0.985–1.094 | 0.165    |                        |            |             |          |
| Platelet count (x 10 <sup>9</sup> /L)        | -0.006               | 0.994      | 0.989–0.998 | 0.009    |                        |            |             |          |
| Vitamin B12 (pg/mL) (dichotomized)           |                      |            |             |          |                        |            |             |          |
| Normal vitamin B12 level (200-900 pg/mL)     | Reference            |            |             |          |                        |            |             |          |
| High vitamin B12 level (> 900 pg/mL)         | 1.270                | 3.561      | 2.041–6.214 | < 0.001  | 1.084                  | 2.955      | 1.669–5.232 | <0.001   |
| Sodium (mEq/L)                               | -0.017               | 0.983      | 0.946–1.022 | 0.385    |                        |            |             |          |
| Potassium (mEq/L)                            | -0.080               | 0.923      | 0.651–1.309 | 0.654    |                        |            |             |          |
| Calcium (mg/dL)                              | -0.194               | 0.824      | 0.617–1.099 | 0.187    |                        |            |             |          |

|                                         |        |       |             |         |        |       |             |       |
|-----------------------------------------|--------|-------|-------------|---------|--------|-------|-------------|-------|
| Glucose (mg/dL)                         | 0.001  | 1.001 | 0.997–1.004 | 0.780   |        |       |             |       |
| Creatinine (mg/dL)                      | 0.049  | 1.050 | 0.886–1.245 | 0.573   |        |       |             |       |
| Ammonia (µg/dL)                         | 0.000  | 1.000 | 0.998–1.003 | 0.795   |        |       |             |       |
| <i>Intraoperative recipient factors</i> |        |       |             |         |        |       |             |       |
| Surgical duration (min)                 | 0.001  | 1.001 | 0.999–1.003 | 0.333   |        |       |             |       |
| Postreperfusion syndrome                | 0.301  | 1.351 | 0.884–2.063 | 0.165   |        |       |             |       |
| Average of vital signs                  |        |       |             |         |        |       |             |       |
| MBP (mmHg)                              | -0.004 | 0.996 | 0.988–1.004 | 0.337   |        |       |             |       |
| HR (beats/min)                          | 0.015  | 1.015 | 0.999–1.031 | 0.059   |        |       |             |       |
| CVP (mmHg)                              | 0.006  | 1.006 | 0.932–1.086 | 0.882   |        |       |             |       |
| Mean lactate (mmol/L)                   | 0.056  | 1.061 | 0.977–1.152 | 0.161   |        |       |             |       |
| <i>Blood product transfusion (unit)</i> |        |       |             |         |        |       |             |       |
| Packed red blood cells                  | 0.033  | 1.034 | 1.011–1.057 | 0.003   |        |       |             |       |
| Fresh frozen plasma                     | 0.041  | 1.042 | 1.014–1.071 | 0.003   |        |       |             |       |
| Platelet concentrate                    | -0.003 | 0.997 | 0.983–1.011 | 0.655   |        |       |             |       |
| Hourly fluid infusion (mL/kg/h)         | 0.010  | 1.097 | 0.992–1.028 | 0.295   |        |       |             |       |
| Hourly urine output (mL/kg/h)           | -0.503 | 0.605 | 0.474–0.771 | < 0.001 | -0.406 | 0.666 | 0.520–0.853 | 0.001 |
| <i>Donor-graft factors</i>              |        |       |             |         |        |       |             |       |
| Age (years)                             | 0.006  | 1.006 | 0.987–1.025 | 0.543   |        |       |             |       |
| Sex(male)                               | -0.385 | 0.680 | 0.428–1.083 | 0.104   |        |       |             |       |
| GRWR (%)                                | 0.081  | 1.084 | 0.983–1.196 | 0.107   |        |       |             |       |
| Graft ischemic time (min)               | 0.001  | 1.001 | 1.000–1.002 | 0.030   |        |       |             |       |
| Fatty change (%)                        | 0.028  | 1.028 | 0.999–1.058 | 0.055   |        |       |             |       |

**Abbreviations:** AKI, acute kidney injury; MELD, model for end-stage liver disease; GRWR, graft-recipient-weight-ratio; MBP, mean blood pressure; HR, heart rate; CVP, central venous pressure
