# Supplementary material
Source: HighWire-hosted journal article supplement (https://bmjopen.bmj.com/content/10/11/e038990)
Supplement: inline-supplementary-material-4 [file inline-supplementary-material-4.pdf]

**Additional file 4.** Effects of vitamin B12 level on kidney function in PS-matched patients

| Group                                  | Normal kidney function | Mild AKI (stage 1) | Moderate to severe AKI (stage 2-3) | <i>p</i>           |
|----------------------------------------|------------------------|--------------------|------------------------------------|--------------------|
| <i>n</i>                               | 160                    | 27                 | 11                                 | 0.006 <sup>†</sup> |
| Normal vitamin B12<br>( <i>n</i> = 99) | 88 (55%)               | 8 (29.6%)          | 3 (27.3%)                          |                    |
| High vitamin B12<br>( <i>n</i> = 99)   | 72 (45%)               | 19 (70.4%)         | 8 (72.7%)                          |                    |

**Abbreviations:** PS, propensity score; AKI, acute kidney injury

<sup>†</sup>Statistical significance using a linear by linear method

**NOTE:** Values are expressed as numbers and proportions.
